# Supplementary material for: Evaluation of [68Ga]Ga-DOTA-TCTP-1 for the Detection of Metalloproteinase 2/9 Expression in Mouse Atherosclerotic Plaques
Source: PubMed Central journal article supplement (PMC6321344; doi:10.3390/molecules23123168), 2018-12-01
Supplement: molecules-23-03168-s001.pdf [file molecules-23-03168-s001.pdf]

Supplementary material

## Evaluation of [<sup>68</sup>Ga]Ga-DOTA-TCTP-1 for the detection of metalloproteinase 2/9 expression in mouse atherosclerotic plaques

Max Kiugel<sup>1</sup>, Sanna Hellberg<sup>1</sup>, Meeri Käkälä<sup>1</sup>, Heidi Liljenbäck<sup>1,2</sup>, Tiina Saanijoki<sup>1</sup>, Xiang-Guo Li<sup>3</sup>, Johanna Tuomela<sup>3</sup>, Juhani Knuuti<sup>1,5</sup>, Antti Saraste<sup>1,5,6,7</sup>, Anne Roivainen<sup>1,2,5,\*</sup>

<sup>1</sup> Turku PET Centre, University of Turku, Turku, Finland; max.kiugel@utu.fi (M.K.); sanna.hellberg@utu.fi (S.H.); meeri.kakela@utu.fi (M.K.); halilj@utu.fi (H.L.); tiina.saanijoki@utu.fi (T.S.); juhani.knuuti@utu.fi (J.K.); antti.saraste@utu.fi (A.S.); anne.roivainen@utu.fi (A.R.)

<sup>2</sup> Turku Center for Disease Modeling, University of Turku, Turku, Finland

<sup>3</sup> Turku PET Centre, Åbo Akademi University, Turku, Finland; xiali@utu.fi (X-G.L.)

<sup>4</sup> Department of Cell Biology and Anatomy, University of Turku, Turku, Finland; johanna.tuomela@utu.fi (J.T.)

<sup>5</sup> Turku PET Centre, Turku University Hospital, Turku, Finland

<sup>6</sup> Heart Center, Turku University Hospital, Turku, Finland

<sup>7</sup> Institute of Clinical Medicine, University of Turku, Turku, Finland

\* Correspondence: anne.roivainen@utu.fi; Tel.: +358-2-3132862

Received: 23 November 2018; Accepted: 29 November 2018; Published: date

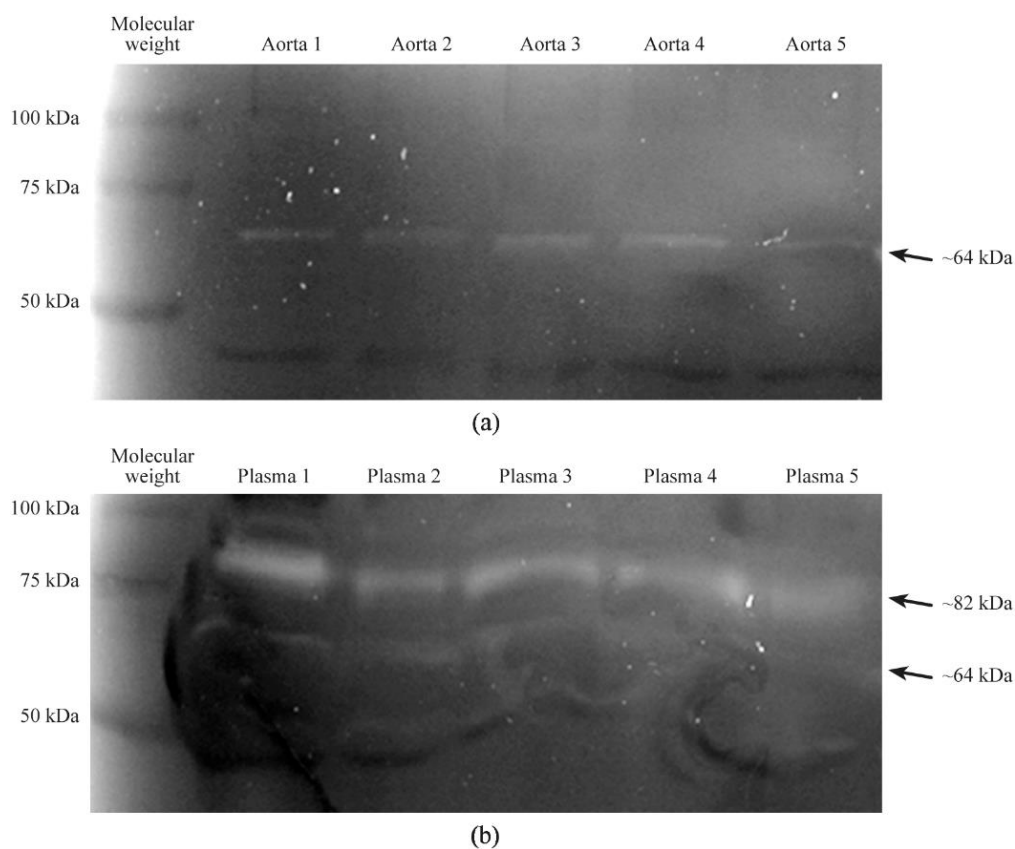

**Supplementary Figure 1.** Zymographs of atherosclerotic mouse aortas (a) and plasma (b). The molecular weights of activated MMP-2 and MMP-9 are 64 kDa and 82 kDa, respectively. Dark bands represent molecular weight markers, and white bands are positive signals where enzymatic activity has degraded the gel structure.
